# Supplementary material
Source: PubMed Central journal article supplement (PMC2556451)
Supplement: supp_178_7_688__1.pdf [file supp_178_7_688__1.pdf]

## **Data Supplement**

### ***ARG1* is a novel bronchodilator response gene: screening and replication in four asthma cohorts**

Augusto A. Litonjua  
Jessica Lasky-Su  
Kady Schneiter  
Kelan G. Tantisira  
Ross Lazarus  
Barbara Klanderman  
John J. Lima  
Charles G. Irvin  
Stephen P. Peters  
John P. Hanrahan  
Stephen B. Liggett  
Gregory A. Hawkins  
Deborah A. Meyers  
Eugene R. Bleeker  
Christoph Lange  
Scott T. Weiss

## **Methods**

### **Study Populations.**

We utilized DNA samples from four clinical trials. All patients or their legal guardians consented to each trial study protocol and ancillary genetic testing. The population we used for the screening algorithm was the Childhood Asthma Management Program (CAMP), a multicenter, randomized, double-blinded clinical trial testing the safety and efficacy of inhaled budesonide vs. nedocromil vs. placebo over a mean of 4.3 years. Trial design and methodology have been published(E1, E2). A total of 418 children were randomized to the placebo group, from which we included the 209 Caucasian probands and their parents as part of a parent-child trio for these analyses. These trios formed the basis of our family-based screening cohort for bronchodilator response (BDR). Only subjects randomized to the placebo group were utilized for the screening analyses to avoid confounding effects of medications (corticosteroids and nedocromil) other than inhaled  $\beta$ -agonist.

The population we used for the first replication study (hereafter called the Asthma Trial) was composed of 432 Caucasian subjects with asthma(E3, E4) who were part of an asthma medication trial conducted by Sepracor, Inc. in the United States. To qualify for inclusion, patients had to be nonsmokers, have no significant comorbid medical conditions, and to have diagnostic findings consistent with moderate to severe asthma according to American Thoracic Society (ATS) criteria(E5). The only medications used by the patients were inhaled beta agonists as needed. Patients were required to have a forced expiratory volume in 1 second (FEV<sub>1</sub>) of 40-85% of predicted normal values after at least eight hours without inhaled short-acting  $\beta$ -agonists; oral or inhaled corticosteroids were excluded for six weeks before the study. Reversibility of

airflow obstruction by beta agonists (15% change required) or methacholine sensitivity testing was employed to confirm asthma diagnosis.

Two completed trials conducted by the American Lung Association Asthma Clinical Research Centers (ALA-ACRC), the Leukotriene modifier or Corticosteroid or Corticosteroid Salmeterol trial (LOCCS)(E6) and the Effectiveness of Low Dose Theophylline as Add-on Treatment in Asthma (LODO) trial(E7), were used as the second and third replication samples. The LOCCS cohort comprised 500 subjects  $\geq 6$  yrs old who successfully completed a 4-6 week run-in period of inhaled fluticasone propionate. Subjects were required to have a pre-bronchodilator FEV<sub>1</sub> of  $\geq 80\%$  of predicted value, 12% or higher bronchodilator reversibility or PC20 of 8 mg/ml or less within the past two years, and well controlled asthma (Juniper Asthma Control Questionnaire score  $< 1.5$ ) after the run-in period. The data for BDR for this analysis was determined from spirometry performed after completion of the run-in period. The 166 Caucasian subjects for whom DNA was available were used for this analysis. The LODO cohort comprised 489 participants  $\geq 15$  years old with poorly controlled asthma (regardless of baseline treatment regimen) as measured by a score of  $\geq 1.5$  on the Juniper asthma control questionnaire. Participants who had smoked within the last 6 months or who had a  $> 20$  pack-year smoking history were excluded. At baseline, asthma severity was rated according to symptoms by the Asthma Symptom Utility Index (ASUI)(E8) and according to lung function by peak flow and spirometry (before and after bronchodilator). The 155 Caucasian subjects for whom DNA was available were used for this analysis.

### **Genotyping.**

We genotyped 844 SNPs in 111 candidate genes: 42 genes involved in beta adrenergic signaling and regulation; 28 genes involved in innate glucocorticoid synthesis and metabolism, cellular receptors, and transcriptional regulators; and 41 genes from prior asthma association studies that had been previously conducted in the CAMP dataset (Supplementary Table 1). Candidate genes in the beta adrenergic and corticosteroid pathways were selected based on prior studies in the literature, their known involvement in metabolic pathways(E9, E10), and on expert opinion (SBL and KGT). Corticosteroid pathway candidate genes were included in this analysis because of the known interactions between beta2 agonists and corticosteroids(E11, E12). Finally, we included the candidate genes that our group had previously genotyped and studied in CAMP, since these were already available and so as to appropriately adjust our current analyses for all prior tests conducted with these genes. SNPs were primarily selected utilizing public databases, although resequencing of several core genes was performed. We over-sampled exonic and promoter regions and attempted coverage of at least one SNP every 10 kb. We emphasized golden-gate validated and LD tag SNPs, where available. Replicate genotyping was performed in the candidate genes powered in CAMP as below.

SNPs were genotyped via an Illumina BeadStation 500G (Illumina Inc., San Diego, CA) and via a SEQUENOM MassARRAY MALDI-TOF mass spectrometer (Sequenom, San Diego, CA). For the Illumina system, primers were created upon the submission of SNPs of interest. For each gene of interest, all SNPs available in the public database (dbSNP) were pulled. The flanking sequences for these SNPs were evaluated with the Illumina Assay Design Tool by the technical support group at Illumina (San Diego, CA). A file was returned that contained, for each SNP, a design score, design rank, and minor allele frequency in all available populations,

functional status, chromosome and position, and validation status (single submitter, multi-submitter, or pre-validated on Illumina platform). Design scores (scale of 0 to 1) indicates the likelihood of the assay design converting to a successful genotyping assay, with higher scores correlating with greater success. The design score is based on an algorithm that takes into account repetitive sequence, other SNPs that may interfere with primer placement, and GC content. SNPs with scores above 0.6 were selected for inclusion in the GoldenGate multiplex, with preference given to score above 0.8. Preference was also given to multi-hit or pre-validated assays, and markers with minor allele frequency  $> 0.5$ . A semiautomated primer design program (SpectroDESIGNER, Sequenom) was used for Sequenom. Each genotype was checked for percent completion rates and replicate genotyping was performed on a subset of genotypes for quality control. SNPs were also checked for Mendelian inconsistencies and for Hardy-Weinberg Equilibrium.

### **Statistical Methodology.**

The primary outcome measure of the association analyses was acute response to inhaled bronchodilator (BDR), and calculated as the percent difference between the pre- and post-bronchodilator FEV<sub>1</sub> value ( $BDR = 100 \times [\text{post FEV}_1 - \text{pre FEV}_1 / \text{pre FEV}_1]$ ). In all analyses, both screening and replication, BDR was treated as a continuous variable. We initially screened the genotypic association with BDR in CAMP using a modified version of the screening algorithm applied to genome-wide association studies as detailed by Van Steen, et al(E13). Our algorithm differed in that we screened to maximize power at the candidate gene level instead of the SNP marker level. This was both to provide a basis for replication at both the SNP and at the locus level, since differences in the LD patterns within our 4 populations were unknown prior to

genotyping. Moreover, we wanted to ascertain a consistent signal across a gene in order to augment our efforts in functional modeling. We used repeated measures of BDR over the four years of the trial in the Placebo group using the FBAT-PC statistic to maximize the heritability of a given marker and thereby maximize power for the screening stage. Only additive genetic models were evaluated for this analysis. We selected the most powerful candidate genes by first ranking the individual SNPs based upon conditional power and then evaluating the median rank of all of the SNPs within a given candidate gene. Conditional power was calculated based on first assigning expected probabilities of genotypes for each proband, based on parental genotypes (i.e. the screening method is blinded to the actual genotypes of the probands), then estimating the effect size for each of the expected proband genotypes. We selected genes whose median SNP ranks for power were within the top 25% of all SNPs genotyped to be taken forward for genotyping in the Asthma Trial population. We evaluated the FBAT-PC statistics for the SNPs for replication for directionality of the association for each SNP, and this allowed us to conduct 1-sided tests in the replication analyses. We selected 99 SNPs from 14 genes for replication in this population.

The analyses of the replicate populations were performed using generalized linear models as incorporated into PROC GLM of the SAS statistical analysis software (version 9.0, SAS Institute, Cary, NC). For all replicate analyses, SNP genotypes were coded for additive models. Only BDR calculated from the pre- and post-bronchodilator spirometric measurements at all baseline visits (prior to randomization) for all the trials were used. All models adjusted for age, gender, height, and baseline FEV<sub>1</sub>. Genes with at least one SNP that was at least marginally associated with BDR (one-sided p-value < 0.05) were then genotyped in the final two replicate

populations (these were genotyped together, but analyzed sequentially). We then took the p-values (2-sided) from the original family-based analysis and the 1-sided p-values from the replication cohorts and combined them using a standard Fischer's method to increase statistical efficiency(E14). Prior evaluations of the Asthma Trial cohort has revealed no evidence of population stratification(3, 4). In a separate analysis of a random panel of 160 SNPs across the genome in both the LOCCS and the LODO populations, we found no evidence of population stratification. FBAT testing in CAMP is robust to potential population admixture(E15).

Table E1. 844 SNPs from 111 genes screened in CAMP.

| Gene                    | Chromosome | Role*             | rs#                 | Allele <sup>†</sup> | PBAT Power <sup>‡</sup> |
|-------------------------|------------|-------------------|---------------------|---------------------|-------------------------|
| <i>ACVRL1</i>           | 12         | candidate         | rs706812            | A                   | 0.001                   |
| <i>ADAM33</i>           | 20         | candidate         | rs2280090           | G                   | 0.051858291             |
|                         |            |                   | rs2280093           | C                   | 0.011184686             |
|                         |            |                   | rs2485700           | T                   | 0.380180012             |
|                         |            |                   | rs3918395           | G                   | 0.070842636             |
|                         |            |                   | rs487377            | G                   | 0.255535487             |
|                         |            |                   | rs597980            | C                   | 0.152426886             |
|                         |            |                   | rs615436            | A                   | 0.001                   |
|                         |            |                   | rs630712            | A                   | 0.150491812             |
| <i>ADCY7</i>            | 16         | adrenergic        | rs1064448           | A                   | 0.052175717             |
|                         |            |                   | rs1540624           | A                   | 0.145272311             |
|                         |            |                   | rs1872691           | C                   | 0.105425872             |
|                         |            |                   | rs2302715           | T                   | 0.135980929             |
|                         |            |                   | rs4785211           | A                   | 0.072756291             |
| <i>ADCY9</i>            | 16         | adrenergic        | rs7184802           | G                   | 0.066152354             |
|                         |            |                   | rs1967309           | A                   | 0.073440134             |
|                         |            |                   | rs2072341           | C                   | 0.130456255             |
|                         |            |                   | rs2072342           | G                   | 0.051637616             |
|                         |            |                   | rs2072346           | A                   | 0.145486577             |
|                         |            |                   | rs2230739           | A                   | 0.073652384             |
|                         |            |                   | rs2230742           | G                   | 0.201548436             |
|                         |            |                   | rs2238436           | G                   | 0.169181456             |
|                         |            |                   | rs2239313           | C                   | 0.197311756             |
|                         |            |                   | rs2240735           | A                   | 0.094816275             |
|                         |            |                   | rs2256156           | G                   | 0.149891269             |
|                         |            |                   | rs2531977           | G                   | 0.170671781             |
|                         |            |                   | rs2531990           | G                   | 0.103440628             |
|                         |            |                   | rs2531992           | C                   | 0.250254879             |
|                         |            |                   | rs2532001           | C                   | 0.022339062             |
|                         |            |                   | rs2601790           | C                   | 0.001                   |
|                         |            |                   | rs2601828           | G                   | 0.061165768             |
|                         |            |                   | rs3730097           | G                   | 0.003236582             |
|                         |            |                   | rs3730129           | G                   | 0.006321889             |
|                         |            |                   | rs432166            | G                   | 0.05984892              |
|                         |            |                   | rs7204987           | G                   | 0.149227494             |
|                         |            |                   | rs879620            | A                   | 0.162428383             |
| <i>ADCYAP1</i>          | 18         | adrenergic        | rs2231187           | C                   | 0.313085988             |
|                         |            |                   | rs928978            | G                   | 0.029118168             |
| <b><i>ADCYAP1R1</i></b> | <b>7</b>   | <b>adrenergic</b> | <b>rs1006622</b>    | <b>T</b>            | <b>0.256716935</b>      |
|                         |            |                   | <b>rs1468687</b>    | <b>A</b>            | <b>0.205544836</b>      |
|                         |            |                   | <b>rs2267732</b>    | <b>A</b>            | <b>0.025170219</b>      |
|                         |            |                   | <b>rs741051</b>     | <b>T</b>            | <b>0.309872353</b>      |
|                         |            |                   | <b>rs741052</b>     | <b>T</b>            | <b>0.332164828</b>      |
|                         |            |                   | <b>rs887703</b>     | <b>C</b>            | <b>0.331598901</b>      |
| <i>ADRB2</i>            | 5          | adrenergic        | rs17287460 (C-709A) | C                   | 0.001                   |
|                         |            |                   | rs1036173           | T                   | 0.17642073              |
|                         |            |                   | rs1036174           | G                   | 0.281146346             |
|                         |            |                   | rs1042713           | G                   | 0.106026779             |



|                    |          |                  |                  |          |                    |
|--------------------|----------|------------------|------------------|----------|--------------------|
|                    |          |                  | rs1042714        | G        | 0.132673182        |
|                    |          |                  | rs1042718        | C        | 0.444037754        |
|                    |          |                  | rs11168070       | G        | 0.306374331        |
|                    |          |                  | rs12654778       | G        | 0.055803514        |
|                    |          |                  | rs1368277        | T        | 0.044732351        |
|                    |          |                  | rs1432626        | C        | 0.004744992        |
|                    |          |                  | rs1432628        | C        | 0.454057244        |
|                    |          |                  | rs1432630        | G        | 0.02102983         |
|                    |          |                  | rs1432631        | G        | 0.030869075        |
|                    |          |                  | rs1800888        | C        | 0.001639273        |
|                    |          |                  | rs1801704        | C        | 0.186666654        |
|                    |          |                  | rs2053044        | A        | 0.160962853        |
|                    |          |                  | rs2116717        | T        | 0.191105085        |
|                    |          |                  | rs754357         | T        | 0.001278948        |
| <i>AQP5</i>        | 12       | candidate        | rs2242357        | C        | 0.224773232        |
|                    |          |                  | rs296753         | G        | 0.001              |
| <b><i>ARG1</i></b> | <b>6</b> | <b>candidate</b> | <b>rs2749935</b> | <b>T</b> | <b>0.272300521</b> |
|                    |          |                  | <b>rs2781659</b> | <b>A</b> | <b>0.374627581</b> |
|                    |          |                  | <b>rs2781663</b> | <b>A</b> | <b>0.320638168</b> |
|                    |          |                  | <b>rs2781665</b> | <b>A</b> | <b>0.317997759</b> |
|                    |          |                  | <b>rs3756780</b> | <b>T</b> | <b>0.024807942</b> |
| <i>ARRB1</i>       | 11       | adrenergic       | rs1676887        | C        | 0.104197828        |
|                    |          |                  | rs1789682        | A        | 0.046618146        |
|                    |          |                  | rs472112         | A        | 0.330691653        |
|                    |          |                  | rs494146         | T        | 0.119123115        |
|                    |          |                  | rs508435         | C        | 0.320030629        |
|                    |          |                  | rs512797         | G        | 0.208760552        |
|                    |          |                  | rs520563         | C        | 0.062436537        |
|                    |          |                  | rs529513         | C        | 0.053073291        |
|                    |          |                  | rs555031         | C        | 0.051917593        |
|                    |          |                  | rs567807         | C        | 0.040410941        |
|                    |          |                  | rs576014         | G        | 0.075495613        |
|                    |          |                  | rs647630         | G        | 0.040782851        |
|                    |          |                  | rs745373         | G        | 0.069142359        |
|                    |          |                  | rs746168         | T        | 0.024732639        |
|                    |          |                  | rs7929974        | G        | 0.059686764        |
|                    |          |                  | rs877711         | C        | 0.034859633        |
|                    |          |                  | rs899115         | C        | 0.048020841        |
| <i>ARRB2</i>       | 17       | adrenergic       | rs2271167        | A        | 0.093592315        |
|                    |          |                  | rs7208257        | A        | 0.164955548        |
|                    |          |                  | rs9905578        | A        | 0.166412107        |
|                    |          |                  | rs9913156        | C        | 0.066431276        |
| <i>ATP2A2</i>      | 12       | adrenergic       | rs1860561        | G        | 0.325541263        |
|                    |          |                  | rs3026434        | A        | 0.001              |
|                    |          |                  | rs3026446        | G        | 0.003627286        |
|                    |          |                  | rs9540           | C        | 0.001              |
| <i>BDKRB1</i>      | 14       | adrenergic       | rs10143977       | T        | 0.057200211        |
|                    |          |                  | rs10147171       | A        | 0.146053489        |
|                    |          |                  | rs11625494       | G        | 0.006929342        |
|                    |          |                  | rs12050217       | T        | 0.094172892        |

|              |           |                   |                   |          |                    |
|--------------|-----------|-------------------|-------------------|----------|--------------------|
|              |           |                   | rs2071084         | G        | 0.095907181        |
|              |           |                   | rs885845          | G        | 0.077292011        |
|              |           |                   | rs10220336        | A        | 0.359491693        |
|              |           |                   | rs1046248         | G        | 0.02837315         |
|              |           |                   | rs11627456        | C        | 0.018955238        |
|              |           |                   | rs11847625        | C        | 0.204448735        |
|              |           |                   | rs1800515         | C        | 0.080336103        |
|              |           |                   | rs1959053         | A        | 0.094355506        |
|              |           |                   | rs2069571         | C        | 0.040627941        |
|              |           |                   | rs2069585         | C        | 0.001              |
|              |           |                   | rs2242964         | C        | 0.02075041         |
|              |           |                   | rs4144132         | T        | 0.047567097        |
|              |           |                   | rs4900312         | G        | 0.511285078        |
|              |           |                   | rs4900318         | G        | 0.480240155        |
|              |           |                   | rs4905461         | C        | 0.15200328         |
|              |           |                   | rs4905470         | G        | 0.049482257        |
|              |           |                   | rs5224            | C        | 0.143017742        |
|              |           |                   | rs5225            | A        | 0.119499924        |
|              |           |                   | rs6575577         | C        | 0.132257345        |
|              |           |                   | rs7150828         | C        | 0.276278372        |
|              |           |                   | rs8008168         | A        | 0.309711224        |
|              |           |                   | rs8012552         | A        | 0.514990824        |
|              |           |                   | rs8016905         | G        | 0.108916199        |
| C5           | 9         | candidate         | rs17611           | T        | 0.028782159        |
|              |           |                   | rs2300931         | T        | 0.069428559        |
| <b>CCL11</b> | <b>17</b> | <b>candidate</b>  | <b>rs4795896</b>  | <b>T</b> | <b>0.066454772</b> |
|              |           |                   | <b>rs1019109</b>  | <b>G</b> | <b>0.339696022</b> |
|              |           |                   | <b>rs17809012</b> | <b>G</b> | <b>0.359312003</b> |
|              |           |                   | <b>rs1860184</b>  | <b>A</b> | <b>0.371290751</b> |
|              |           |                   | <b>rs3744508</b>  | <b>G</b> | <b>0.351959656</b> |
|              |           |                   | <b>rs3815341</b>  | <b>G</b> | <b>0.09543791</b>  |
|              |           |                   | <b>rs4795898</b>  | <b>T</b> | <b>0.084612964</b> |
|              |           |                   | <b>rs714910</b>   | <b>A</b> | <b>0.299029085</b> |
|              |           |                   | <b>rs16969415</b> | <b>C</b> | <b>0.085174995</b> |
| CD3E         | 11        | steroid           | rs1945765         | A        | 0.218305625        |
| CD4          | 12        | steroid           | rs1045261         | T        | 0.037378656        |
|              |           |                   | rs1055141         | T        | 0.059973478        |
|              |           |                   | rs3829972         | G        | 0.060567409        |
| <b>CHRM2</b> | <b>7</b>  | <b>adrenergic</b> | <b>rs6962027</b>  | <b>A</b> | <b>0.296539977</b> |
|              |           |                   | <b>rs6963577</b>  | <b>A</b> | <b>0.357410007</b> |
|              |           |                   | <b>rs6967953</b>  | <b>A</b> | <b>0.291108642</b> |
|              |           |                   | <b>rs8191992</b>  | <b>A</b> | <b>0.284930132</b> |
| CHRM3        | 1         | adrenergic        | rs10495449        | A        | 0.053451229        |
|              |           |                   | rs12021598        | G        | 0.061688339        |
|              |           |                   | rs12036109        | A        | 0.094461392        |
|              |           |                   | rs2067481         | C        | 0.004729275        |
|              |           |                   | rs4072234         | C        | 0.170240983        |
|              |           |                   | rs4659554         | A        | 0.042674494        |
|              |           |                   | rs6669810         | C        | 0.252467227        |
|              |           |                   | rs6682184         | C        | 0.186652392        |

|                |    |             |           |   |                    |
|----------------|----|-------------|-----------|---|--------------------|
| <b>COL2A1</b>  | 12 | candidate   | rs7520974 | C | 0.261688857        |
|                |    |             | rs1635536 | G | <b>0.521197672</b> |
|                |    |             | rs1635544 | G | <b>0.647647593</b> |
|                |    |             | rs1635546 | G | <b>0.592369015</b> |
|                |    |             | rs1793931 | T | <b>0.534527587</b> |
|                |    |             | rs1793959 | C | <b>0.262988133</b> |
|                |    |             | rs1814231 | G | <b>0.001</b>       |
|                |    |             | rs2071357 | G | <b>0.342896609</b> |
|                |    |             | rs2276454 | A | <b>0.41754818</b>  |
|                |    |             | rs2276455 | A | <b>0.442515171</b> |
|                |    |             | rs2276458 | G | <b>0.265763276</b> |
|                |    |             | rs6823    | C | <b>0.613177739</b> |
|                |    |             | rs915920  | G | <b>0.001</b>       |
|                |    |             | rs917055  | G | <b>0.625841941</b> |
| <b>CPM</b>     | 12 | candidate   | rs1144960 | G | <b>0.645973616</b> |
|                |    |             | rs1144961 | G | <b>0.557243239</b> |
|                |    |             | rs1144963 | C | <b>0.297726401</b> |
|                |    |             | rs1908669 | A | <b>0.001178004</b> |
|                |    |             | rs2172988 | C | <b>0.134677726</b> |
|                |    |             | rs2293637 | G | <b>0.277678205</b> |
| <b>CREB1</b>   | 2  | adrenergic  | rs2254137 | A | 0.148364189        |
|                |    |             | rs2551640 | T | 0.132673716        |
|                |    |             | rs2551919 | C | 0.076401059        |
|                |    |             | rs2551921 | A | 0.13956091         |
|                |    |             | rs2709356 | C | 0.101787864        |
|                |    |             | rs2709387 | G | 0.113624623        |
|                |    |             | rs7369949 | T | 0.117943003        |
|                |    |             | rs889895  | A | 0.111307489        |
| <b>CREB3L2</b> | 7  | adrenergic  | rs273957  | C | 0.029345962        |
|                |    |             | rs1008048 | A | 0.059072291        |
| <b>CREB5</b>   | 7  | adrenergic  | rs150607  | C | 0.280659862        |
|                |    |             | rs150610  | A | 0.063282285        |
|                |    |             | rs160335  | G | 0.190920131        |
|                |    |             | rs160337  | G | 0.143431341        |
|                |    |             | rs160356  | C | 0.102925587        |
|                |    |             | rs160357  | A | 0.102998686        |
|                |    |             | rs160369  | A | 0.063970786        |
|                |    |             | rs160375  | T | 0.089178384        |
|                |    |             | rs177584  | G | 0.064901588        |
|                |    |             | rs177590  | T | 0.053333543        |
|                |    |             | rs1859020 | T | 0.191069275        |
|                |    |             | rs1964240 | C | 0.120555404        |
|                |    |             | rs1976489 | G | 0.095210921        |
|                |    |             | rs2073537 | T | 0.086494582        |
|                |    |             | rs216708  | G | 0.213137149        |
|                |    |             | rs216715  | T | 0.057639682        |
| rs216730       | C  | 0.025783676 |           |   |                    |
| rs216737       | G  | 0.22533519  |           |   |                    |
| rs216750       | T  | 0.105041981 |           |   |                    |
| rs217515       | G  | 0.280710392 |           |   |                    |

|               |    |            |                   |          |                    |
|---------------|----|------------|-------------------|----------|--------------------|
|               |    |            | rs217519          | C        | 0.682008068        |
|               |    |            | rs2237351         | A        | 0.44483769         |
|               |    |            | rs2237353         | T        | 0.137142339        |
|               |    |            | rs2237361         | A        | 0.336778121        |
|               |    |            | rs2299110         | A        | 0.274981427        |
|               |    |            | rs2391666         | A        | 0.288084815        |
|               |    |            | rs2391668         | G        | 0.317802703        |
|               |    |            | rs310353          | A        | 0.158906021        |
|               |    |            | rs3757677         | G        | 0.245584528        |
|               |    |            | rs41304           | C        | 0.129943642        |
|               |    |            | rs41305           | C        | 0.114963991        |
|               |    |            | rs41327           | A        | 0.274120017        |
|               |    |            | rs41333           | T        | 0.055454117        |
|               |    |            | rs41334           | A        | 0.033857681        |
|               |    |            | rs41348           | C        | 0.090567667        |
|               |    |            | rs41351           | C        | 0.385552688        |
|               |    |            | rs42322           | T        | 0.092975291        |
|               |    |            | rs4719934         | C        | 0.089746812        |
|               |    |            | rs4719945         | A        | 0.072538914        |
|               |    |            | rs4722804         | C        | 0.040961632        |
|               |    |            | rs4722834         | C        | 0.483247739        |
|               |    |            | rs6462085         | G        | 0.172519991        |
|               |    |            | rs6462088         | A        | 0.389057781        |
|               |    |            | rs6462100         | A        | 0.217025021        |
|               |    |            | rs6949786         | T        | 0.386471967        |
|               |    |            | rs6972081         | G        | 0.25586762         |
|               |    |            | rs6976396         | C        | 0.068462399        |
|               |    |            | rs740315          | A        | 0.09456921         |
|               |    |            | rs757980          | A        | 0.314286632        |
|               |    |            | rs886816          | G        | 0.049193248        |
|               |    |            | rs989438          | T        | 0.164802879        |
| <i>CREBBP</i> | 16 | adrenergic | rs129974          | G        | 0.001              |
|               |    |            | rs2230140         | A        | 0.001              |
| <i>CREBL2</i> | 12 | adrenergic | <b>rs4555</b>     | <b>A</b> | <b>0.254068879</b> |
| <i>CREM</i>   | 10 | adrenergic | <b>rs1057108</b>  | <b>A</b> | <b>0.244079047</b> |
|               |    |            | <b>rs10827491</b> | <b>C</b> | <b>0.254284554</b> |
|               |    |            | <b>rs10827492</b> | <b>C</b> | <b>0.22569427</b>  |
|               |    |            | <b>rs10827493</b> | <b>C</b> | <b>0.283984827</b> |
|               |    |            | <b>rs1148247</b>  | <b>C</b> | <b>0.14977395</b>  |
|               |    |            | <b>rs11592037</b> | <b>C</b> | <b>0.22461565</b>  |
|               |    |            | <b>rs11592356</b> | <b>T</b> | <b>0.336869625</b> |
|               |    |            | <b>rs11597746</b> | <b>C</b> | <b>0.331648519</b> |
|               |    |            | <b>rs1213392</b>  | <b>C</b> | <b>0.280511624</b> |
|               |    |            | <b>rs12761675</b> | <b>T</b> | <b>0.258910646</b> |
|               |    |            | <b>rs1545757</b>  | <b>A</b> | <b>0.176594992</b> |
|               |    |            | <b>rs2295415</b>  | <b>T</b> | <b>0.077870955</b> |
|               |    |            | <b>rs4934535</b>  | <b>C</b> | <b>0.146205678</b> |
|               |    |            | <b>rs4934540</b>  | <b>T</b> | <b>0.258305323</b> |
|               |    |            | <b>rs4934734</b>  | <b>A</b> | <b>0.205964064</b> |
|               |    |            | <b>rs4934736</b>  | <b>G</b> | <b>0.244330188</b> |

|              |    |         |                  |          |                    |
|--------------|----|---------|------------------|----------|--------------------|
|              |    |         | <b>rs6481941</b> | <b>G</b> | <b>0.248354291</b> |
|              |    |         | <b>rs7077242</b> | <b>C</b> | <b>0.250529114</b> |
|              |    |         | <b>rs7913615</b> | <b>A</b> | <b>0.249474673</b> |
| <i>CRH</i>   | 8  | steroid | rs10105164       | C        | 0.079318914        |
|              |    |         | rs11997416       | C        | 0.329387244        |
|              |    |         | rs3176921        | A        | 0.302891618        |
|              |    |         | rs5030875        | T        | 0.074488853        |
|              |    |         | rs6472257        | C        | 0.279434243        |
|              |    |         | rs7835214        | T        | 0.008998522        |
| <i>CRHBP</i> | 5  | steroid | rs10473984       | A        | 0.040949508        |
|              |    |         | rs10514082       | T        | 0.09011322         |
|              |    |         | rs1053989        | A        | 0.010312854        |
|              |    |         | rs1700676        | T        | 0.088683628        |
|              |    |         | rs247742         | G        | 0.090868966        |
|              |    |         | rs3811939        | C        | 0.240640207        |
|              |    |         | rs7718461        | C        | 0.012410772        |
| <i>CRHR1</i> | 17 | steroid | rs12150390       | A        | 0.032133224        |
|              |    |         | rs12950522       | T        | 0.452051696        |
|              |    |         | rs1396862        | T        | 0.240161625        |
|              |    |         | rs171440         | T        | 0.513482771        |
|              |    |         | rs171441         | C        | 0.041119528        |
|              |    |         | rs173365         | A        | 0.118844745        |
|              |    |         | rs1876827        | A        | 0.224428224        |
|              |    |         | rs1876828        | A        | 0.20945287         |
|              |    |         | rs1876829        | A        | 0.20991795         |
|              |    |         | rs1876831        | G        | 0.160918441        |
|              |    |         | rs242925         | C        | 0.366328304        |
|              |    |         | rs242938         | C        | 0.026690213        |
|              |    |         | rs242939         | A        | 0.055168716        |
|              |    |         | rs242941         | G        | 0.322119891        |
|              |    |         | rs242942         | C        | 0.069707281        |
|              |    |         | rs242947         | C        | 0.125320551        |
|              |    |         | rs242949         | C        | 0.301854272        |
|              |    |         | rs242950         | G        | 0.068102785        |
|              |    |         | rs4792886        | G        | 0.031563512        |
|              |    |         | rs4792888        | A        | 0.034166317        |
|              |    |         | rs7209436        | G        | 0.142123271        |
|              |    |         | rs739645         | G        | 0.1932213          |
| <i>CRHR2</i> | 7  | steroid | <b>rs1003929</b> | <b>C</b> | <b>0.287211163</b> |
|              |    |         | <b>rs155100</b>  | <b>T</b> | <b>0.510546554</b> |
|              |    |         | <b>rs2014663</b> | <b>T</b> | <b>0.390533615</b> |
|              |    |         | <b>rs2190242</b> | <b>A</b> | <b>0.097135319</b> |
|              |    |         | <b>rs2240403</b> | <b>C</b> | <b>0.071882927</b> |
|              |    |         | <b>rs2251002</b> | <b>C</b> | <b>0.526386461</b> |
|              |    |         | <b>rs2267712</b> | <b>C</b> | <b>0.227704046</b> |
|              |    |         | <b>rs2267713</b> | <b>G</b> | <b>0.489918981</b> |
|              |    |         | <b>rs2267715</b> | <b>A</b> | <b>0.556974612</b> |
|              |    |         | <b>rs2267716</b> | <b>A</b> | <b>0.107541034</b> |
|              |    |         | <b>rs2270007</b> | <b>G</b> | <b>0.206928498</b> |
|              |    |         | <b>rs2270008</b> | <b>C</b> | <b>0.382708948</b> |

|               |           |                   |            |   |             |
|---------------|-----------|-------------------|------------|---|-------------|
|               |           |                   | rs2284216  | G | 0.191034943 |
|               |           |                   | rs2284217  | G | 0.43015793  |
|               |           |                   | rs2284219  | C | 0.295477331 |
|               |           |                   | rs2284220  | A | 0.233274816 |
|               |           |                   | rs255102   | A | 0.091497673 |
|               |           |                   | rs3735430  | C | 0.002271765 |
|               |           |                   | rs3779250  | A | 0.449884297 |
|               |           |                   | rs4723000  | G | 0.323052951 |
|               |           |                   | rs4723002  | A | 0.055463187 |
|               |           |                   | rs733453   | A | 0.503049917 |
|               |           |                   | rs7793837  | T | 0.120348962 |
|               |           |                   | rs8192496  | A | 0.422070013 |
|               |           |                   | rs917195   | C | 0.079008212 |
|               |           |                   | rs929377   | T | 0.489698913 |
|               |           |                   | rs973022   | A | 0.191183389 |
|               |           |                   | rs975537   | A | 0.561840719 |
| <b>CSK</b>    | <b>15</b> | <b>adrenergic</b> | rs12439525 | C | 0.017997931 |
|               |           |                   | rs1378942  | A | 0.267661343 |
|               |           |                   | rs2168518  | A | 0.259889193 |
|               |           |                   | rs2301249  | G | 0.271375766 |
|               |           |                   | rs7085     | C | 0.302556681 |
| <b>CTSS</b>   | <b>1</b>  | <b>candidate</b>  | rs1136774  | G | 0.282855819 |
| <i>CX3CR1</i> | 3         | adrenergic        | rs2669849  | A | 0.15010471  |
|               |           |                   | rs3732378  | C | 0.150384071 |
|               |           |                   | rs3732379  | G | 0.214402095 |
| <b>DEFB1</b>  | <b>8</b>  | <b>candidate</b>  | rs2738182  | A | 0.710758688 |
|               |           |                   | rs2741136  | C | 0.287021919 |
|               |           |                   | rs5743402  | A | 0.361865511 |
| <i>DPP10</i>  | 2         | candidate         | rs10208402 | C | 0.106011773 |
|               |           |                   | rs6737251  | T | 0.169604702 |
|               |           |                   | rs982213   | G | 0.783015238 |
| <i>F2R</i>    | 5         | adrenergic        | rs153311   | C | 0.064490777 |
|               |           |                   | rs2227744  | A | 0.495744636 |
|               |           |                   | rs2227754  | A | 0.001       |
|               |           |                   | rs2227795  | A | 0.001       |
|               |           |                   | rs2227817  | G | 0.001       |
|               |           |                   | rs27135    | A | 0.337375028 |
|               |           |                   | rs37242    | A | 0.089913645 |
| <i>F2RL1</i>  | 5         | adrenergic        | rs2243010  | C | 0.100281246 |
|               |           |                   | rs2243072  | C | 0.003552027 |
|               |           |                   | rs631465   | C | 0.01209055  |
|               |           |                   | rs6453253  | C | 0.370624492 |
| <i>F2RL3</i>  | 19        | adrenergic        | rs2227349  | C | 0.060802825 |
|               |           |                   | rs706765   | A | 0.041701571 |
|               |           |                   | rs7245967  | C | 0.06717012  |
|               |           |                   | rs773901   | A | 0.125468343 |
| <i>FBN2</i>   | 5         | candidate         | rs154001   | T | 0.315396916 |
|               |           |                   | rs154003   | G | 0.213905086 |
|               |           |                   | rs1801167  | G | 0.001       |
|               |           |                   | rs2042327  | T | 0.218425441 |

|              |    |            |            |   |             |
|--------------|----|------------|------------|---|-------------|
|              |    |            | rs2307110  | A | 0.069754958 |
|              |    |            | rs27855    | A | 0.18599896  |
|              |    |            | rs28114    | G | 0.19433764  |
|              |    |            | rs32209    | T | 0.175743397 |
|              |    |            | rs32216    | T | 0.277987385 |
|              |    |            | rs331079   | G | 0.025259402 |
|              |    |            | rs3805635  | T | 0.02299758  |
|              |    |            | rs3805651  | G | 0.104419937 |
|              |    |            | rs3805652  | A | 0.038489389 |
|              |    |            | rs468026   | T | 0.133940325 |
|              |    |            | rs764371   | A | 0.105462185 |
| <i>FCER2</i> | 19 | candidate  | rs10415518 | G | 0.033648218 |
|              |    |            | rs12610479 | G | 0.202843348 |
|              |    |            | rs12611038 | A | 0.262149529 |
|              |    |            | rs12980031 | A | 0.155320675 |
|              |    |            | rs1990975  | C | 0.124802901 |
|              |    |            | rs2277989  | T | 0.284483267 |
|              |    |            | rs2277991  | T | 0.112755888 |
|              |    |            | rs2287867  | T | 0.162565659 |
|              |    |            | rs2287868  | T | 0.2403883   |
|              |    |            | rs3760687  | C | 0.010240238 |
|              |    |            | rs4804221  | A | 0.21978839  |
|              |    |            | rs4804773  | A | 0.342302546 |
|              |    |            | rs4996974  | T | 0.383907392 |
|              |    |            | rs7249320  | G | 0.296417825 |
|              |    |            | rs753733   | G | 0.06318342  |
|              |    |            | rs8110128  | G | 0.120893747 |
|              |    |            | rs889182   | A | 0.114907445 |
| <i>GAL</i>   | 11 | adrenergic | rs1042577  | T | 0.215461261 |
|              |    |            | rs1546309  | A | 0.143852595 |
|              |    |            | rs2513304  | A | 0.332273463 |
|              |    |            | rs3136538  | A | 0.206974022 |
|              |    |            | rs3136541  | C | 0.243709464 |
|              |    |            | rs3136543  | A | 0.21228777  |
| <i>GATA3</i> | 10 | candidate  | rs10905277 | G | 0.142840763 |
|              |    |            | rs1149901  | G | 0.031664313 |
|              |    |            | rs1399180  | C | 0.083082828 |
|              |    |            | rs2229359  | G | 0.037732034 |
|              |    |            | rs2229360  | C | 0.001       |
|              |    |            | rs2275806  | A | 0.178831595 |
|              |    |            | rs406103   | C | 0.447198351 |
|              |    |            | rs485411   | G | 0.036024832 |
| <i>GRK4</i>  | 4  | adrenergic | rs1024323  | C | 0.134313057 |
|              |    |            | rs1056094  | G | 0.227540918 |
|              |    |            | rs1801058  | C | 0.456058127 |
|              |    |            | rs2471322  | A | 0.203160852 |
|              |    |            | rs2471327  | C | 0.110343217 |
|              |    |            | rs2471337  | A | 0.21970918  |
|              |    |            | rs2471350  | A | 0.138994039 |
|              |    |            | rs2488806  | T | 0.114126711 |

|                     |           |                |                 |          |                    |
|---------------------|-----------|----------------|-----------------|----------|--------------------|
|                     |           |                | rs2488815       | G        | 0.167594142        |
|                     |           |                | rs2960306       | G        | 0.231936649        |
|                     |           |                | rs3021140       | C        | 0.265565148        |
| <i>GRK5</i>         | 10        | adrenergic     | rs10886430      | A        | 0.2014091          |
|                     |           |                | rs11198907      | C        | 0.076649799        |
|                     |           |                | rs1268947       | G        | 0.120716409        |
|                     |           |                | rs1473799       | C        | 0.026173123        |
|                     |           |                | rs1475753       | C        | 0.21993736         |
|                     |           |                | rs1537576       | C        | 0.137367549        |
|                     |           |                | rs2085185       | G        | 0.07060072         |
|                     |           |                | rs2230345       | T        | 0.003549978        |
|                     |           |                | rs2230349       | C        | 0.148552534        |
|                     |           |                | rs4752266       | A        | 0.326206526        |
|                     |           |                | rs506657        | A        | 0.190829298        |
|                     |           |                | rs915394        | T        | 0.238084115        |
|                     |           |                | rs928670        | A        | 0.328653439        |
| <i>GRK7</i>         | 3         | adrenergic     | rs11921607      | T        | 0.117783275        |
|                     |           |                | rs2138789       | A        | 0.137705936        |
|                     |           |                | rs4234469       | G        | 0.285880035        |
|                     |           |                | rs4337623       | A        | 0.226718476        |
|                     |           |                | rs4683625       | C        | 0.249005544        |
|                     |           |                | rs6806847       | A        | 0.225880364        |
| <i>HAT1</i>         | 2         | steroid        | rs10165126      | C        | 0.097389995        |
|                     |           |                | rs10439296      | A        | 0.221910295        |
|                     |           |                | rs10930498      | C        | 0.18045929         |
|                     |           |                | rs11692418      | G        | 0.279534718        |
|                     |           |                | rs1443700       | G        | 0.313639258        |
|                     |           |                | rs1982288       | T        | 0.210954077        |
|                     |           |                | rs3791342       | A        | 0.001              |
|                     |           |                | rs6758494       | T        | 0.280138762        |
| <i>HDAC1</i>        | 1         | steroid        | rs6697130       | A        | 0.001              |
| <i>HDAC2</i>        | 6         | steroid        | rs10499079      | C        | 0.049945546        |
|                     |           |                | rs10499080      | C        | 0.063810156        |
|                     |           |                | rs2499618       | C        | 0.049536925        |
|                     |           |                | rs3757016       | C        | 0.157203653        |
|                     |           |                | rs6568819       | C        | 0.180301098        |
|                     |           |                | rs9481408       | C        | 0.400636654        |
| <b><i>HDAC3</i></b> | <b>5</b>  | <b>steroid</b> | <b>rs187515</b> | <b>C</b> | <b>0.234420322</b> |
|                     |           |                | <b>rs32956</b>  | <b>C</b> | <b>0.284339831</b> |
| <b><i>HDAC5</i></b> | <b>17</b> | <b>steroid</b> | <b>rs228757</b> | <b>C</b> | <b>0.350353677</b> |
|                     |           |                | <b>rs375171</b> | <b>A</b> | <b>0.17927437</b>  |
| <i>HDAC7A</i>       | 12        | steroid        | rs2240106       | C        | 0.107589108        |
|                     |           |                | rs2240108       | C        | 0.070172838        |
|                     |           |                | rs2301783       | A        | 0.125542086        |
|                     |           |                | rs3782908       | A        | 0.408269818        |
| <i>HSPCA</i>        | 14        | steroid        | rs2277465       | G        | 0.00129919         |
|                     |           |                | rs2298877       | G        | 0.045349473        |
|                     |           |                | rs4906179       | G        | 0.066133861        |
|                     |           |                | rs8004640       | G        | 0.084642789        |
| <i>IFNG</i>         | 12        | candidate      | rs1861494       | A        | 0.054581684        |



|               |          |                  |                   |          |                    |
|---------------|----------|------------------|-------------------|----------|--------------------|
|               |          |                  | rs2069727         | G        | 0.087332538        |
| <b>IKBKAP</b> | <b>9</b> | <b>candidate</b> | <b>rs10759326</b> | <b>A</b> | <b>0.454160801</b> |
|               |          |                  | <b>rs11791783</b> | <b>G</b> | <b>0.210236129</b> |
| <i>IL10</i>   | 1        | candidate        | rs1800871         | C        | 0.180983287        |
|               |          |                  | rs1800872         | C        | 0.091547065        |
|               |          |                  | rs1800896         | G        | 0.344973432        |
|               |          |                  | rs3024492         | A        | 0.360132946        |
|               |          |                  | rs3024496         | C        | 0.323327241        |
|               |          |                  | rs3024509         | T        | 0.132081736        |
| <i>IL12B</i>  | 5        | candidate        | rs1368439         | A        | 0.229968469        |
|               |          |                  | rs2569253         | A        | 0.084247734        |
|               |          |                  | rs3181216         | T        | 0.283829525        |
|               |          |                  | rs3212219         | G        | 0.120777336        |
| <i>IL13</i>   | .        | candidate        | G+2044A           | G        | 0.179815332        |
| <i>IL18BP</i> | 11       | candidate        | G9772A6           | C        | 0.99999043         |
|               |          |                  | rs1541304         | C        | 0.032313321        |
|               |          |                  | rs1573503         | C        | 0.039641094        |
|               |          |                  | rs1892919         | A        | 0.238324822        |
|               |          |                  | rs2298455         | A        | 0.106359307        |
|               |          |                  | rs3814721         | T        | 0.23974763         |
|               |          |                  | rs949323          | G        | 0.080435917        |
| <i>IL22</i>   | 12       | candidate        | rs2227485         | C        | 0.313672938        |
|               |          |                  | rs2227513         | A        | 0.068633788        |
| <i>IRAK3</i>  | 12       | candidate        | rs1152888         | G        | 0.140872862        |
|               |          |                  | rs1152909         | C        | 0.234872683        |
|               |          |                  | rs1168774         | G        | 0.194520772        |
|               |          |                  | rs1732887         | A        | 0.024966293        |
|               |          |                  | rs1732888         | T        | 0.055183921        |
|               |          |                  | rs2701653         | C        | 0.080496836        |
| <i>ITPR1</i>  | 3        | adrenergic       | rs13079522        | C        | 0.217679473        |
|               |          |                  | rs1389162         | A        | 0.100471669        |
|               |          |                  | rs1866999         | A        | 0.099271793        |
|               |          |                  | rs1994500         | A        | 0.0636528          |
|               |          |                  | rs2054871         | C        | 0.051328803        |
|               |          |                  | rs2119802         | A        | 0.21032721         |
|               |          |                  | rs2291859         | C        | 0.143692665        |
|               |          |                  | rs2291862         | C        | 0.540808322        |
|               |          |                  | rs2306874         | C        | 0.003371338        |
|               |          |                  | rs2306875         | A        | 0.35805047         |
|               |          |                  | rs2306877         | G        | 0.099303681        |
|               |          |                  | rs2306881         | G        | 0.067273526        |
|               |          |                  | rs304011          | A        | 0.050931716        |
|               |          |                  | rs304028          | A        | 0.198055501        |
|               |          |                  | rs304039          | G        | 0.210788702        |
|               |          |                  | rs3792494         | A        | 0.014774918        |
|               |          |                  | rs3792511         | A        | 0.06762596         |
|               |          |                  | rs3804984         | C        | 0.0635552          |
|               |          |                  | rs3804999         | C        | 0.057726513        |
|               |          |                  | rs3805018         | A        | 0.161115835        |
|               |          |                  | rs4510365         | T        | 0.122114757        |

|              |    |            |            |   |             |
|--------------|----|------------|------------|---|-------------|
|              |    |            | rs4685785  | A | 0.137231681 |
|              |    |            | rs4685798  | C | 0.062373573 |
|              |    |            | rs6442887  | A | 0.083843588 |
|              |    |            | rs6442905  | G | 0.026355986 |
|              |    |            | rs6768493  | G | 0.164543294 |
|              |    |            | rs6786081  | G | 0.090528733 |
|              |    |            | rs6786487  | G | 0.061493027 |
|              |    |            | rs6802929  | G | 0.044653673 |
|              |    |            | rs731915   | C | 0.188481036 |
|              |    |            | rs7630009  | T | 0.153166816 |
|              |    |            | rs7631664  | A | 0.072296952 |
|              |    |            | rs873768   | C | 0.371844771 |
|              |    |            | rs901856   | G | 0.127328929 |
|              |    |            | rs9815192  | A | 0.123414069 |
|              |    |            | rs9876432  | T | 0.05408341  |
| <i>ITPR2</i> | 12 | adrenergic | rs1002835  | T | 0.060631463 |
|              |    |            | rs1007938  | A | 0.095725126 |
|              |    |            | rs1031301  | A | 0.139870524 |
|              |    |            | rs10743585 | T | 0.198398847 |
|              |    |            | rs10743591 | C | 0.060719775 |
|              |    |            | rs10743592 | T | 0.144525396 |
|              |    |            | rs10771277 | C | 0.30996399  |
|              |    |            | rs10771301 | A | 0.123089168 |
|              |    |            | rs10842720 | A | 0.104445099 |
|              |    |            | rs10842774 | A | 0.250039638 |
|              |    |            | rs10842796 | T | 0.014244758 |
|              |    |            | rs10842797 | T | 0.022274484 |
|              |    |            | rs10842798 | A | 0.016915129 |
|              |    |            | rs11048588 | A | 0.043933404 |
|              |    |            | rs12313993 | G | 0.049222491 |
|              |    |            | rs12582043 | C | 0.258806764 |
|              |    |            | rs1386810  | G | 0.172520984 |
|              |    |            | rs1393413  | C | 0.180434599 |
|              |    |            | rs1463589  | G | 0.228349258 |
|              |    |            | rs1463590  | A | 0.065708547 |
|              |    |            | rs1482979  | G | 0.044832041 |
|              |    |            | rs1484881  | A | 0.051299017 |
|              |    |            | rs1532720  | A | 0.121026817 |
|              |    |            | rs1565175  | G | 0.134385925 |
|              |    |            | rs1875579  | G | 0.144365502 |
|              |    |            | rs2035440  | C | 0.127456389 |
|              |    |            | rs2036434  | G | 0.113219525 |
|              |    |            | rs2062165  | C | 0.097108232 |
|              |    |            | rs2170980  | A | 0.144964016 |
|              |    |            | rs2171520  | A | 0.082148521 |
|              |    |            | rs2230377  | C | 0.028316173 |
|              |    |            | rs2270960  | T | 0.216454459 |
|              |    |            | rs2306549  | G | 0.266559406 |
|              |    |            | rs2880877  | G | 0.219108756 |
|              |    |            | rs3782290  | T | 0.192903948 |

|              |    |            |            |   |             |
|--------------|----|------------|------------|---|-------------|
|              |    |            | rs3782294  | C | 0.184991764 |
|              |    |            | rs3782295  | C | 0.160719066 |
|              |    |            | rs3782309  | C | 0.0462586   |
|              |    |            | rs3816834  | C | 0.233113001 |
|              |    |            | rs4963984  | C | 0.088346425 |
|              |    |            | rs4963993  | C | 0.044787919 |
|              |    |            | rs4964005  | A | 0.118411327 |
|              |    |            | rs7137796  | A | 0.269343162 |
|              |    |            | rs728009   | A | 0.1064405   |
|              |    |            | rs7297828  | A | 0.320455494 |
|              |    |            | rs7306427  | C | 0.037722993 |
|              |    |            | rs7309048  | C | 0.180760705 |
|              |    |            | rs732149   | G | 0.230458618 |
|              |    |            | rs7960020  | T | 0.175712771 |
|              |    |            | rs901840   | T | 0.186409558 |
|              |    |            | rs984972   | C | 0.164592686 |
| <i>ITPR3</i> | 6  | adrenergic | rs10947415 | C | 0.152634178 |
|              |    |            | rs10947426 | A | 0.237369259 |
|              |    |            | rs10947428 | T | 0.391017807 |
|              |    |            | rs1536036  | A | 0.320025431 |
|              |    |            | rs1570760  | C | 0.240397925 |
|              |    |            | rs2274197  | C | 0.163313669 |
|              |    |            | rs2281917  | G | 0.480273183 |
|              |    |            | rs2296329  | T | 0.075356078 |
|              |    |            | rs2296343  | A | 0.297529781 |
|              |    |            | rs2296742  | A | 0.186150328 |
|              |    |            | rs3736893  | C | 0.322833447 |
|              |    |            | rs3804550  | C | 0.001       |
|              |    |            | rs3818526  | A | 0.499118874 |
|              |    |            | rs4259245  | A | 0.383043505 |
|              |    |            | rs4711332  | C | 0.121885216 |
|              |    |            | rs4711336  | A | 0.137297801 |
|              |    |            | rs594223   | A | 0.461252998 |
|              |    |            | rs6457738  | C | 0.242242455 |
|              |    |            | rs6901411  | C | 0.343627381 |
|              |    |            | rs6903502  | C | 0.100210682 |
|              |    |            | rs6913517  | C | 0.018516954 |
|              |    |            | rs6921825  | C | 0.119025282 |
|              |    |            | rs9366826  | G | 0.191381481 |
|              |    |            | rs9368771  | T | 0.456901906 |
|              |    |            | rs942643   | C | 0.130252086 |
|              |    |            | rs9469537  | C | 0.355046527 |
|              |    |            | rs999943   | T | 0.196986462 |
| <i>KITLG</i> | 12 | candidate  | ASP210TYR  | G | 0.001       |
|              |    |            | rs1472899  | T | 0.100130794 |
|              |    |            | rs995030   | G | 0.039512694 |
| <i>LOX</i>   | 5  | candidate  | rs840466   | G | 0.171182609 |
|              |    |            | rs840467   | G | 0.20303067  |
| <i>MAPK1</i> | 22 | adrenergic | rs13058    | A | 0.069775933 |
|              |    |            | rs2266967  | C | 0.040706842 |

|                     |          |                  |                  |          |                    |
|---------------------|----------|------------------|------------------|----------|--------------------|
|                     |          |                  | rs2266969        | G        | 0.02475453         |
|                     |          |                  | rs2283793        | A        | 0.022048352        |
|                     |          |                  | rs2283794        | A        | 0.071027449        |
|                     |          |                  | rs2298432        | A        | 0.029941269        |
|                     |          |                  | rs2298434        | G        | 0.061895455        |
|                     |          |                  | rs4821402        | C        | 0.06623561         |
|                     |          |                  | rs9610375        | C        | 0.027662652        |
| <i>MAPK3</i>        | 16       | adrenergic       | rs12922100       | G        | 0.116702363        |
| <i>MDM2</i>         | 12       | candidate        | rs769412         | T        | 0.160677711        |
| <i>MFNG</i>         | 22       | candidate        | rs2284052        | C        | 0.021113473        |
| <i>MMP12</i>        | 11       | candidate        | rs476391         | G        | 0.110766879        |
|                     |          |                  | rs632009         | T        | 0.403426572        |
|                     |          |                  | rs651159         | A        | 0.158437354        |
|                     |          |                  | rs652438         | A        | 0.097685139        |
|                     |          |                  | rs660727         | C        | 0.131074354        |
| <i>MMP19</i>        | 12       | candidate        | rs1056784        | C        | 0.001              |
|                     |          |                  | rs1056785        | T        | 0.01074801         |
|                     |          |                  | rs2242295        | A        | 0.566233124        |
| <i>MS4A2</i>        | 11       | steroid          | rs12576889       | A        | 0.035178676        |
|                     |          |                  | rs2583476        | C        | 0.126168047        |
|                     |          |                  | rs2847655        | A        | 0.152003302        |
|                     |          |                  | rs2847668        | A        | 0.128095498        |
|                     |          |                  | rs502581         | A        | 0.110095958        |
|                     |          |                  | rs512555         | G        | 0.006245678        |
|                     |          |                  | rs556917         | A        | 0.048878797        |
|                     |          |                  | rs569108         | A        | 0.006262096        |
|                     |          |                  | rs574700         | C        | 0.012490966        |
| <b><i>NCOA1</i></b> | <b>2</b> | <b>steroid</b>   | <b>rs2119117</b> | <b>C</b> | <b>0.264825034</b> |
| <i>NCOA2</i>        | 8        | steroid          | rs3088092        | T        | 0.056501951        |
|                     |          |                  | rs4738070        | G        | 0.021877729        |
| <i>NDFIP1</i>       | 5        | candidate        | rs2338820        | G        | 0.108277629        |
|                     |          |                  | rs249637         | C        | 0.094152393        |
|                     |          |                  | rs249680         | A        | 0.119679119        |
|                     |          |                  | rs8378           | C        | 0.178410832        |
| <b><i>NOS3</i></b>  | <b>7</b> | <b>candidate</b> | <b>rs1799983</b> | <b>G</b> | <b>0.328489109</b> |
| <i>NR0B2</i>        | 1        | steroid          | rs6659176        | C        | 0.098322665        |
| <i>NR1I2</i>        | 3        | steroid          | rs12721607       | C        | 0.035764236        |
|                     |          |                  | rs3732360        | T        | 0.062483024        |
|                     |          |                  | rs3814055        | C        | 0.064615829        |
|                     |          |                  | rs3814058        | T        | 0.105523248        |
| <i>NR3C1</i>        | 5        | steroid          | rs10041520       | A        | 0.174877626        |
|                     |          |                  | rs10052957       | C        | 0.18220497         |
|                     |          |                  | rs10482616       | C        | 0.296096104        |
|                     |          |                  | rs10482633       | T        | 0.235748881        |
|                     |          |                  | rs10482655       | A        | 0.103998829        |
|                     |          |                  | rs1438732        | C        | 0.198131591        |
|                     |          |                  | rs2918418        | C        | 0.206929396        |
|                     |          |                  | rs2918419        | A        | 0.212746666        |
|                     |          |                  | rs2963154        | A        | 0.200220679        |
|                     |          |                  | rs33389          | C        | 0.175956395        |

|               |    |            |            |   |             |
|---------------|----|------------|------------|---|-------------|
|               |    |            | rs4986593  | A | 0.077038757 |
|               |    |            | rs6188     | C | 0.157787634 |
|               |    |            | rs6189     | G | 0.001       |
|               |    |            | rs6191     | A | 0.247702562 |
|               |    |            | rs6196     | T | 0.219828574 |
|               |    |            | rs6198     | T | 0.232338472 |
|               |    |            | rs6877893  | C | 0.279053342 |
|               |    |            | rs852975   | T | 0.201812136 |
|               |    |            | rs852977   | A | 0.049155217 |
|               |    |            | rs852978   | T | 0.265915264 |
|               |    |            | rs860457   | T | 0.055273806 |
|               |    |            | rs9324918  | T | 0.085377481 |
| <i>P11</i>    | 12 | candidate  | rs1233046  | G | 0.185016658 |
|               |    |            | rs1235153  | C | 0.055646268 |
|               |    |            | rs2074531  | G | 0.06511118  |
|               |    |            | rs2074532  | C | 0.212888695 |
|               |    |            | rs2285830  | T | 0.119080516 |
|               |    |            | rs2285831  | G | 0.19971427  |
|               |    |            | rs886431   | A | 0.182912334 |
|               |    |            | rs929269   | C | 0.082260394 |
| <i>PCAF</i>   | 3  | steroid    | rs10510499 | T | 0.049835763 |
|               |    |            | rs3021408  | G | 0.08578828  |
| <i>PCDH12</i> | 5  | candidate  | rs10323    | A | 0.007339409 |
|               |    |            | rs108042   | T | 0.134686589 |
|               |    |            | rs164073   | A | 0.232223517 |
|               |    |            | rs164074   | G | 0.408058635 |
|               |    |            | rs164079   | A | 0.344053867 |
|               |    |            | rs164083   | A | 0.650156113 |
|               |    |            | rs164515   | T | 0.100193843 |
|               |    |            | rs2434322  | C | 0.331412767 |
|               |    |            | rs252108   | G | 0.128569467 |
|               |    |            | rs252109   | C | 0.001       |
|               |    |            | rs3747717  | C | 0.173821098 |
| <i>PLCB1</i>  | 20 | adrenergic | rs1033399  | A | 0.184665341 |
|               |    |            | rs1033566  | A | 0.071511799 |
|               |    |            | rs1040496  | C | 0.142445409 |
|               |    |            | rs1047383  | C | 0.075577025 |
|               |    |            | rs1237071  | A | 0.041854043 |
|               |    |            | rs1883503  | C | 0.193514331 |
|               |    |            | rs2076413  | G | 0.092775988 |
|               |    |            | rs2142669  | A | 0.189444068 |
|               |    |            | rs2223837  | A | 0.10570851  |
|               |    |            | rs227130   | C | 0.122818168 |
|               |    |            | rs2294259  | C | 0.023462477 |
|               |    |            | rs4399790  | G | 0.231344469 |
|               |    |            | rs6055578  | A | 0.199399714 |
|               |    |            | rs6077332  | C | 0.083152291 |
|               |    |            | rs6077414  | G | 0.184529019 |
|               |    |            | rs6086473  | G | 0.131163538 |
|               |    |            | rs708933   | C | 0.138629763 |

|                |    |            |            |   |             |
|----------------|----|------------|------------|---|-------------|
|                |    |            | rs737532   | T | 0.099069903 |
|                |    |            | rs926506   | A | 0.086557515 |
| <i>PLCB2</i>   | 15 | adrenergic | rs1869901  | T | 0.088680831 |
|                |    |            | rs3784399  | C | 0.232263337 |
|                |    |            | rs936212   | T | 0.001       |
| <i>PLCB3</i>   | 11 | adrenergic | rs2244625  | C | 0.057438336 |
|                |    |            | rs915987   | C | 0.021711042 |
| <i>PLCB4</i>   | 20 | adrenergic | rs1474670  | C | 0.038934871 |
|                |    |            | rs2076392  | T | 0.060691673 |
|                |    |            | rs6077510  | A | 0.162075261 |
|                |    |            | rs742279   | G | 0.084620533 |
| <i>PLN</i>     | 6  | adrenergic | rs3752581  | C | 0.484757023 |
|                |    |            | rs9481825  | C | 0.133746848 |
|                |    |            | rs9489435  | T | 0.034575018 |
| <i>POMC</i>    | 2  | steroid    | rs1866146  | C | 0.3137269   |
|                |    |            | rs3769671  | A | 0.028209774 |
|                |    |            | rs6713532  | A | 0.098847758 |
|                |    |            | rs6719226  | G | 0.026025807 |
|                |    |            | rs7565877  | A | 0.153140763 |
|                |    |            | rs934778   | A | 0.372722772 |
| <i>PPARG</i>   | 3  | candidate  | rs1175542  | G | 0.252898259 |
|                |    |            | rs1801282  | C | 0.130633148 |
|                |    |            | rs709150   | C | 0.210913768 |
|                |    |            | rs709157   | A | 0.110146665 |
| <i>PTAFR</i>   | 1  | adrenergic | rs313149   | A | 0.001       |
|                |    |            | rs313151   | G | 0.137212086 |
| <i>PTGIR</i>   | 19 | adrenergic | rs1126510  | T | 0.260201234 |
|                |    |            | rs11668478 | G | 0.136345104 |
| <i>RAC2</i>    | 22 | steroid    | rs1064498  | A | 0.116266983 |
|                |    |            | rs2284038  | A | 0.119115571 |
|                |    |            | rs6572     | C | 0.209685045 |
|                |    |            | rs739043   | C | 0.264098091 |
| <i>RAPGEF3</i> | 12 | adrenergic | rs2072115  | A | 0.091779575 |
|                |    |            | rs2074534  | G | 0.314593596 |
|                |    |            | rs2238143  | G | 0.052944401 |
|                |    |            | rs2238144  | C | 0.085735385 |
|                |    |            | rs2239189  | C | 0.061382451 |
|                |    |            | rs2240079  | G | 0.297860091 |
|                |    |            | rs2240080  | T | 0.4455054   |
|                |    |            | rs757282   | T | 0.27168553  |
| <i>RASGRP4</i> | 19 | candidate  | rs1541919  | C | 0.184577519 |
|                |    |            | rs3745962  | G | 0.060735084 |
|                |    |            | rs3745963  | T | 0.036044274 |
|                |    |            | rs892055   | G | 0.080856315 |
|                |    |            | rs919781   | C | 0.066259284 |
|                |    |            | RSG4_G165R | G | 0.317627516 |
| <i>RGS12</i>   | 4  | adrenergic | rs2269497  | A | 0.013533329 |
|                |    |            | rs2281470  | C | 0.105801661 |
| <i>RGS16</i>   | 1  | adrenergic | rs1144566  | C | 0.00460986  |
|                |    |            | rs680431   | C | 0.02370444  |

|                 |           |                |                  |          |                    |
|-----------------|-----------|----------------|------------------|----------|--------------------|
| <b>Serpina6</b> | <b>14</b> | <b>steroid</b> | <b>rs1042394</b> | <b>G</b> | <b>0.285276117</b> |
|                 |           |                | <b>rs2228542</b> | <b>C</b> | <b>0.26024923</b>  |
|                 |           |                | <b>rs3748320</b> | <b>G</b> | <b>0.194064581</b> |
| <i>SMARCB1</i>  | 22        | steroid        | rs11705032       | C        | 0.014800745        |
|                 |           |                | rs11912715       | T        | 0.0618335          |
|                 |           |                | rs2073387        | C        | 0.062541882        |
|                 |           |                | rs2186364        | T        | 0.058995189        |
|                 |           |                | rs2186370        | C        | 0.039988487        |
|                 |           |                | rs2267034        | T        | 0.04211419         |
|                 |           |                | rs3177244        | G        | 0.030186482        |
|                 |           |                | rs3788362        | C        | 0.042758657        |
|                 |           |                | rs5751738        | G        | 0.062541882        |
|                 |           |                | rs5751745        | G        | 0.037424064        |
|                 |           |                | rs5760045        | A        | 0.041032919        |
|                 |           |                | rs5996620        | G        | 0.05034238         |
|                 |           |                | rs6003904        | A        | 0.025388595        |
|                 |           |                | rs6003909        | C        | 0.038879695        |
|                 |           |                | rs738799         | G        | 0.024756998        |
|                 |           |                | rs8135303        | T        | 0.018951439        |
|                 |           |                | rs9608196        | A        | 0.021897865        |
| rs9612484       | G         | 0.13489727     |                  |          |                    |
| <i>SMARCE1</i>  | 17        | steroid        | rs1029791        | T        | 0.108284631        |
|                 |           |                | rs1048573        | A        | 0.524267757        |
|                 |           |                | rs1526603        | G        | 0.082081955        |
|                 |           |                | rs2014704        | T        | 0.600549569        |
|                 |           |                | rs3752026        | A        | 0.504680701        |
|                 |           |                | rs757412         | G        | 0.065755506        |
| <i>SPINK5</i>   | 5         | candidate      | rs2303067        | G        | 0.189982287        |
| <i>STAT3</i>    | 17        | steroid        | rs1053023        | A        | 0.138895101        |
|                 |           |                | rs2230097        | T        | 0.013879767        |
|                 |           |                | rs2293152        | G        | 0.066120383        |
|                 |           |                | rs2306581        | T        | 0.069795483        |
|                 |           |                | rs3198502        | A        | 0.145107281        |
|                 |           |                | rs3744483        | A        | 0.136037536        |
|                 |           |                | rs8075442        | G        | 0.003659108        |
|                 |           |                | rs957971         | C        | 0.037501564        |
| <i>STAT6</i>    | 12        | steroid        | rs1057290        | G        | 0.018418786        |
|                 |           |                | rs3024983        | C        | 0.01392359         |
|                 |           |                | rs324015         | C        | 0.09864506         |
| <i>TACR1</i>    | 2         | adrenergic     | rs10208860       | G        | 0.166958504        |
|                 |           |                | rs1861457        | A        | 0.052594279        |
|                 |           |                | rs2024512        | A        | 0.038361768        |
|                 |           |                | rs2111378        | C        | 0.092728194        |
|                 |           |                | rs3755456        | A        | 0.079191191        |
|                 |           |                | rs3771809        | A        | 0.063706908        |
|                 |           |                | rs3771827        | A        | 0.138950289        |
|                 |           |                | rs3771836        | G        | 0.1871268          |
|                 |           |                | rs3771859        | C        | 0.097449364        |
|                 |           |                | rs3821318        | G        | 0.279001823        |
| rs4439987       | T         | 0.147709418    |                  |          |                    |

|                    |           |                |                   |          |                    |
|--------------------|-----------|----------------|-------------------|----------|--------------------|
|                    |           |                | rs6546951         | G        | 0.038594166        |
|                    |           |                | rs6715729         | G        | 0.028491763        |
| <i>TBX21</i>       | 17        | candidate      | CLSNP2_050902     | C        | 0.199320383        |
|                    |           |                | CLSNP3_050902     | G        | 0.171529157        |
|                    |           |                | PRO485PRO         | G        | 0.010442218        |
|                    |           |                | rs11650354        | C        | 0.060939643        |
|                    |           |                | rs1808192         | C        | 0.254876802        |
|                    |           |                | rs2013383         | A        | 0.350882897        |
|                    |           |                | rs2074190         | G        | 0.83533594         |
|                    |           |                | rs2158079         | T        | 0.564666617        |
|                    |           |                | rs2240017         | C        | 0.149997997        |
|                    |           |                | rs2325717         | A        | 0.10240464         |
|                    |           |                | rs4794067         | C        | 0.757533384        |
|                    |           |                | rs7502875         | A        | 0.625420146        |
|                    |           |                | rs9910408         | A        | 0.091129323        |
|                    |           |                | WITBET_10_082902  | G        | 0.037833858        |
|                    |           |                | WITBET_18_082902  | C        | 0.186519107        |
|                    |           |                | WITBET_6          | T        | 0.07041005         |
|                    |           |                | WITBET_8_082902   | G        | 0.06419135         |
| <i>TGFB1</i>       | 19        | candidate      | rs1800472         | G        | 0.001499019        |
| <i>TLR10</i>       | 4         | candidate      | rs10776482        | T        | 0.278132178        |
|                    |           |                | rs10776483        | T        | 0.353563755        |
|                    |           |                | rs10856839        | A        | 0.082238223        |
|                    |           |                | rs11096955        | A        | 0.189568999        |
|                    |           |                | rs11096956        | G        | 0.310491838        |
|                    |           |                | rs11096957        | A        | 0.194000983        |
|                    |           |                | rs11466617        | A        | 0.103266402        |
|                    |           |                | rs11466657        | T        | 0.029004888        |
|                    |           |                | rs4129009         | A        | 0.105701756        |
|                    |           |                | rs4274855         | G        | 0.111563084        |
| <i>TLR4</i>        | 9         | candidate      | rs10759932        | T        | 0.122278817        |
|                    |           |                | rs1927914         | G        | 0.347081488        |
|                    |           |                | rs4986790         | A        | 0.107193733        |
|                    |           |                | rs4986791         | C        | 0.025657056        |
|                    |           |                | rs7866214         | C        | 0.015756465        |
| <i>TNF</i>         | 6         | candidate      | rs1800610         | G        | 0.058017131        |
|                    |           |                | rs1800629         | G        | 0.171502513        |
| <b><i>UCN3</i></b> | <b>10</b> | <b>steroid</b> | <b>rs10795269</b> | <b>A</b> | <b>0.437990192</b> |
|                    |           |                | <b>rs7088971</b>  | <b>C</b> | <b>0.601152296</b> |
|                    |           |                | <b>rs7478136</b>  | <b>C</b> | <b>0.481779856</b> |
| <i>VDR</i>         | 12        | candidate      | rs10735810        | T        | 0.079955732        |
|                    |           |                | rs1540339         | C        | 0.278656778        |
|                    |           |                | rs2239179         | C        | 0.089538484        |
|                    |           |                | rs3782905         | C        | 0.034802494        |
|                    |           |                | rs731236          | G        | 0.176428429        |
|                    |           |                | rs7975232         | A        | 0.665085079        |

\* Defined as whether the gene was chosen as part of the adrenergic pathway, steroid pathway, or a prior asthma candidate gene. Bolded entries are the genes whose median SNP ranks were in the top quartile of ranks of the 844 SNPs screened.

† The associated allele in an additive genetic model.

‡ Estimated power for replication obtained from the PBAT screening analysis.



References:

- E1. 1999. The Childhood Asthma Management Program (CAMP); design, rationale, and methods. Childhood Asthma Management Program Research Group. *Control Clin Trials* 20:91-120.
- E2. 2000. Long-term effects of budesonide or nedocromil in children with asthma. Childhood Asthma Management Program Research Group. *N Engl J Med* 343:1054-1063.
- E3. Baron, R. M., L. J. Palmer, K. Tantisira, S. Gabriel, L. A. Sonna, L. Le, A. Hallock, T. A. Libermann, J. M. Drazen, S. T. Weiss, and E. S. Silverman. 2002. DNA sequence variants in epithelium-specific ETS-2 and ETS-3 are not associated with asthma. *Am J Respir Crit Care Med* 166(7):927-32.
- E4. Silverman, E. S., L. J. Palmer, V. Subramaniam, A. Hallock, S. Mathew, J. Vallone, D. S. Faffe, T. Shikanai, B. A. Raby, S. T. Weiss, and S. A. Shore. 2004. Transforming growth factor-beta1 promoter polymorphism C-509T is associated with asthma. *Am J Respir Crit Care Med* 169(2):214-9.
- E5. 1995. ATS Statement: Standards for the diagnosis and care of patients with chronic obstructive pulmonary disease. *Am J Respir Crit Care Med* 152:s77-s-120.
- E6. Peters, S. P., N. Anthonisen, M. Castro, J. T. Holbrook, C. G. Irvin, L. J. Smith, and R. A. Wise. 2007. Randomized comparison of strategies for reducing treatment in mild persistent asthma. *N Engl J Med* 356(20):2027-39.
- E7. 2007. American Lung Association Asthma Clinical Research Centers. Clinical trial of low-dose theophylline and montelukast in patients with poorly controlled asthma. *Am J Respir Crit Care Med* 175(3):235-42.
- E8. Revicki, D. A., N. K. Leidy, F. Brennan-Diemer, S. Sorensen, and A. Togias. 1998. Integrating patient preferences into health outcomes assessment: the multiattribute Asthma Symptom Utility Index. *Chest* 114(4):998-1007.
- E9. Litonjua AA, Thorn CF, Liggett SB. B-agonist and  $\beta$ -blocker pathway. 2004 August 1, 2007 [cited 2008 May 11]. Available from: <http://www.pharmgkb.org/do/serve?objId=PA2024&objCls=Pathway>.
- E10. Weiss ST, Litonjua AA, Tantisira KG, Wong M-L, Thorn CF, Licinio J. Glucocorticoid and inflammatory genes pathway. 2003 August 1, 2007 [cited 2008 May 11]. Available from: <http://www.pharmgkb.org/do/serve?objId=PA2026&objCls=Pathway>.
- E11. Barnes, P. J. 2007. Scientific rationale for using a single inhaler for asthma control. *Eur Respir J* 29(3):587-95.
- E12. Johnson, M. 2004. Interactions between corticosteroids and beta2-agonists in asthma and chronic obstructive pulmonary disease. *Proc Am Thorac Soc* 1(3):200-6.
- E13. Van Steen, K., M. B. McQueen, A. Herbert, B. Raby, H. Lyon, D. L. Demeo, A. Murphy, J. Su, S. Datta, C. Rosenow, M. Christman, E. K. Silverman, N. M. Laird, S. T. Weiss, and C. Lange. 2005. Genomic screening and replication using the same data set in family-based association testing. *Nat Genet* 37(7):683-91.
- E14. Skol, A. D., L. J. Scott, G. R. Abecasis, and M. Boehnke. 2006. Joint analysis is more efficient than replication-based analysis for two-stage genome-wide association studies. *Nat Genet* 38(2):209-13.
- E15. Lange, C., D. DeMeo, E. K. Silverman, S. T. Weiss, and N. M. Laird. 2004. PBAT: tools for family-based association studies. *Am J Hum Genet* 74(2):367-9.
